# Supplementary figures and images for: Culturable Screening of Plant Growth-Promoting and Biocontrol Bacteria in the Rhizosphere and Phyllosphere of Wild Rice
Source: MDPI journal article supplement (doi:10.3390/microorganisms10071468), 2022-07-20

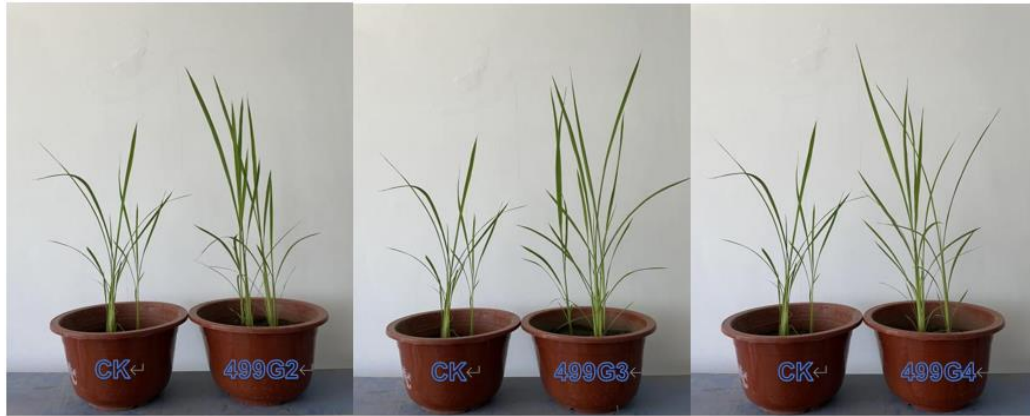

**Figure S1.** Pot experiment inoculated with the screened bacteria 499G2, 499G3, and 499G4.

Supplement: s1 [file s1]
